# Supplementary material for: Development of a vitrified CRISPR/Cas12b-based assay for rapid genotyping of SLCO1B1 SNPs without DNA amplification
Source: Royal Society of Chemistry journal article supplement (doi:10.1039/d4ay02015d), 2025-01-01

## Supplementary Data

**Table 1** The primer sequences used in this study

| Primer Name  | Sequence (5'-3')                           |
|--------------|--------------------------------------------|
| T7P-F        | TAATACGACTCACTATAGGGGTCT                   |
| 388-sgRNA1-R | AATCGATATTAGTTTCTTTAGTGCCACTTCTCAGATTTGAGA |
| 388-sgRNA2-R | TATCGATTCATCAGAAAATTGTGCCACTTCTCAGATTTGAGA |
| 388-sgRNA3-R | AAACTAATATCGATTCATCAGTGCCACTTCTCAGATTTGAGA |
| 388-sgRNA4-R | AAGAACTAATATCGATTCAGTGCCACTTCTCAGATTTGAGA  |
| 388-sgRNA5-R | GAAACTAATATCGATTCATCGTGCCACTTCTCAGATTTGAGA |
| 521-sgRNA1-R | ATGAACGCATATATCCACATGTGCCACTTCTCAGATTTGAGA |
| 521-sgRNA2-R | ACCCATGAACGCATATATCCGTGCCACTTCTCAGATTTGAGA |
| 521-sgRNA3-R | TTACCCATGAACGCATATATGTGCCACTTCTCAGATTTGAGA |
| 521-sgRNA4-R | CATATTACCCATGAACGCATGTGCCACTTCTCAGATTTGAGA |
| 521-sgRNA5-R | TGGATATATGCGTTCATGGGGTGCCACTTCTCAGATTTGAGA |

**Table 2** The response surface analysis level coding

| <b>Factor</b>           | <b>Code</b> | <b>Level</b> |    |     |
|-------------------------|-------------|--------------|----|-----|
|                         |             | -1           | 0  | 1   |
| Vacuum pressure (kPa)   | <i>A</i>    | 90           | 95 | 100 |
| Drying Temperature (°C) | <i>B</i>    | 15           | 20 | 25  |
| Drying Time (h)         | <i>C</i>    | 4            | 5  | 6   |

**Table 3** The response surface analysis level coding

| <b>Run</b> | <b>Factor A</b><br>(Vacuum pressure) | <b>Factor B</b><br>(Drying Temperature) | <b>Factor C</b><br>(Drying Time) | <b>Response</b><br>(residual relative activity(%)) |
|------------|--------------------------------------|-----------------------------------------|----------------------------------|----------------------------------------------------|
| 1          | -1                                   | -1                                      | 0                                | 92.85                                              |
| 2          | -1                                   | 1                                       | 0                                | 93.60                                              |
| 3          | 1                                    | 1                                       | 0                                | 97.15                                              |
| 4          | 0                                    | 0                                       | 0                                | 97.61                                              |
| 5          | 0                                    | 0                                       | 0                                | 98.11                                              |
| 6          | 1                                    | 0                                       | -1                               | 95.62                                              |
| 7          | -1                                   | 0                                       | 1                                | 93.86                                              |
| 8          | 0                                    | -1                                      | 1                                | 96.05                                              |
| 9          | 0                                    | 1                                       | 1                                | 97.06                                              |
| 10         | 0                                    | 0                                       | 0                                | 97.98                                              |
| 11         | 1                                    | 0                                       | 1                                | 97.12                                              |
| 12         | -1                                   | 0                                       | -1                               | 93.56                                              |
| 13         | 1                                    | -1                                      | 0                                | 93.89                                              |
| 14         | 0                                    | -1                                      | -1                               | 94.73                                              |
| 15         | 0                                    | 1                                       | -1                               | 96.42                                              |
| 16         | 0                                    | 0                                       | 0                                | 98.02                                              |
| 17         | 0                                    | 0                                       | 0                                | 98.17                                              |

## Figure S1

Microscopic forms of vacuum-dried vitrified CRISPR/Cas12b premix with different additives

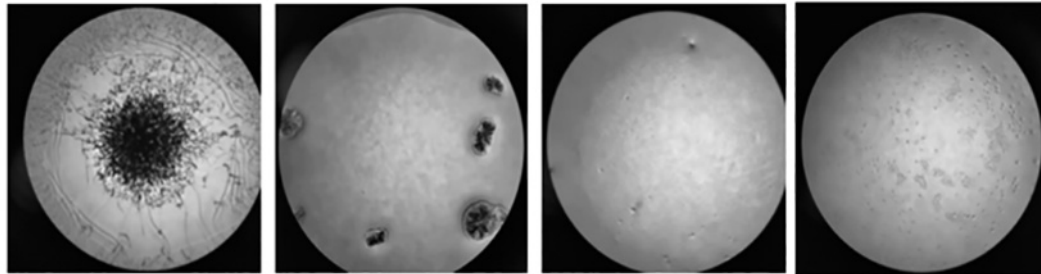

Methyl- $\beta$ -cyclodextrin

Panose

Hyaluronic acid

Xanthan gum

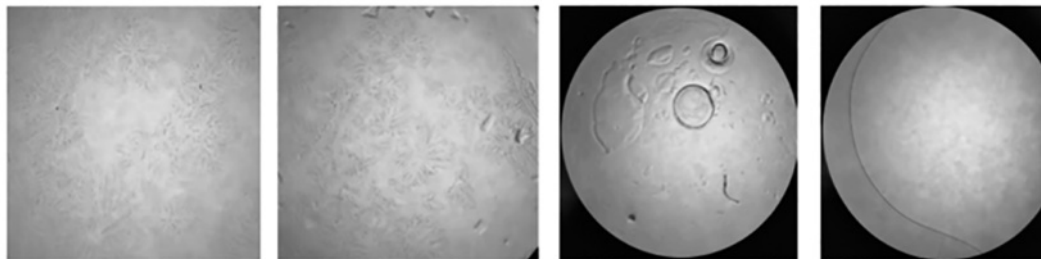

Sodium alginate

Pullulan

Pectin

Sucrose

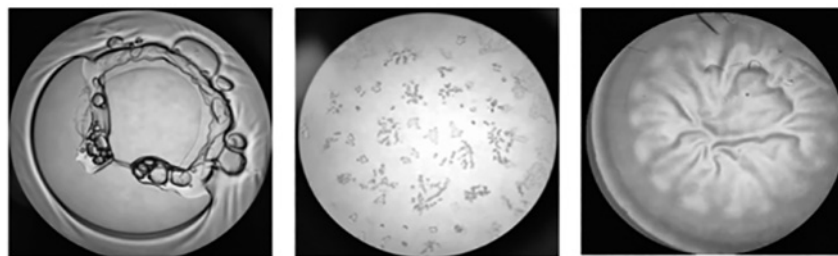

CMC

Trehalose

Maltodextrin

## Figure S2

Effects of response surface analysis levels on residual relative activity of vitrified CRISPR/Cas12b premix

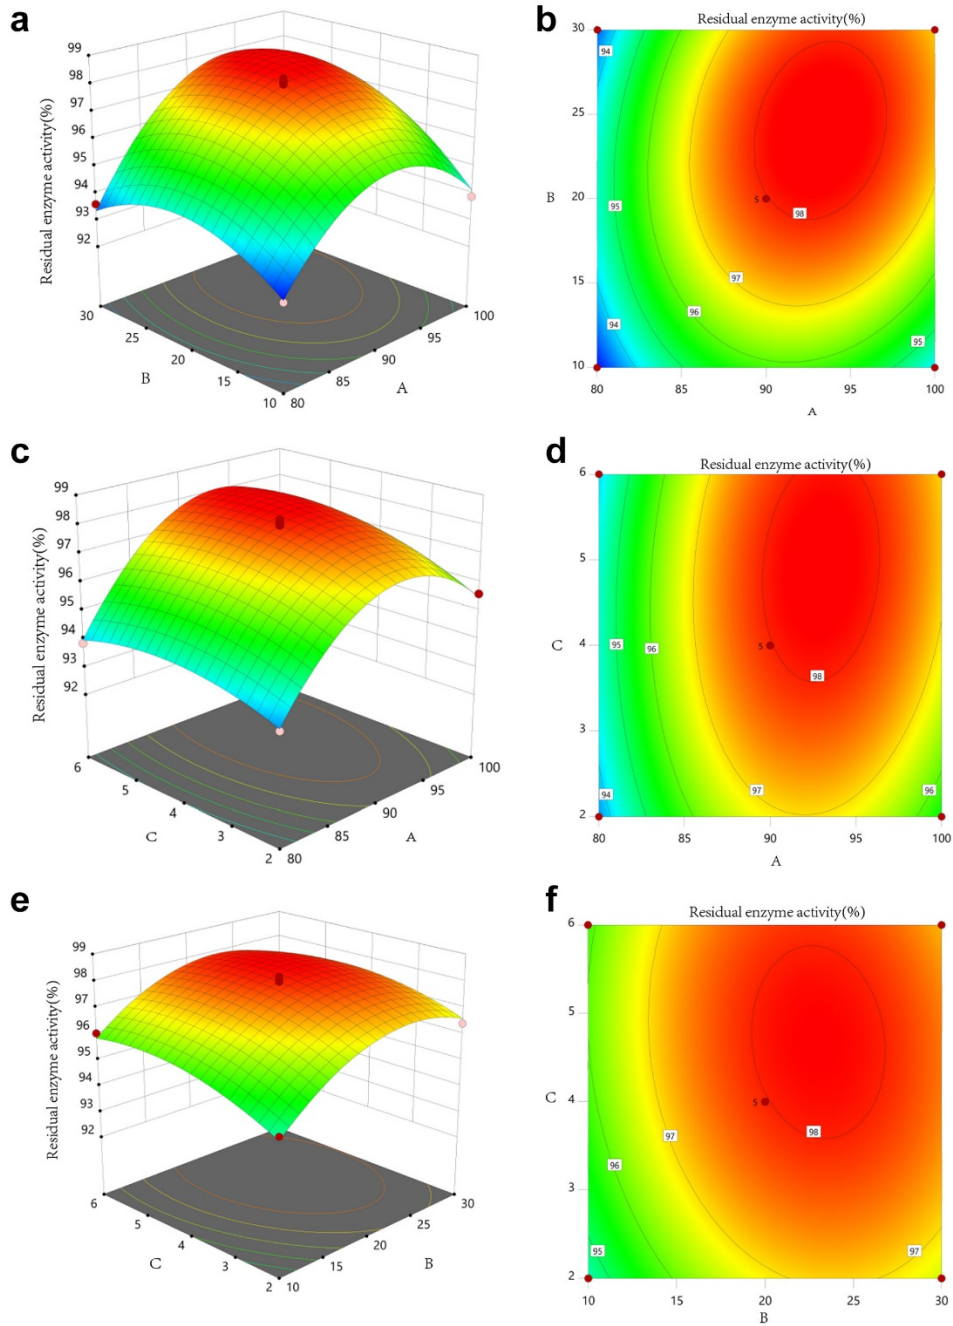

Supplement: d4ay02015d1.pdf [file d4ay02015d1.pdf]
